# Supplementary material
Source: MDPI journal article supplement (https://www.mdpi.com/1424-8247/15/7/771)
Supplement: s1 [file s1]

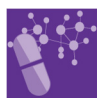

## Article

# Anti-inflammatory activity of piquerol isolated from *Piqueria trinervia* Cav.

Nimsi Campos-Xolalpa, Ana Laura Esquivel-Campos, Rubria Marlen Martínez-Casares, Salud Pérez-Gutiérrez, Julia Pérez-Ramos \* and Ernesto Sánchez-Mendoza \*

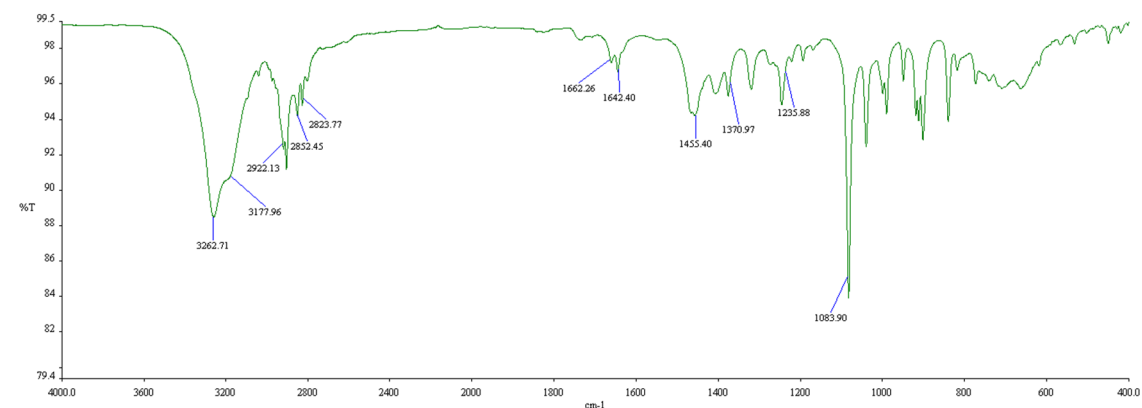

Figure S1. Spectrum of TF-IR of Piquerol

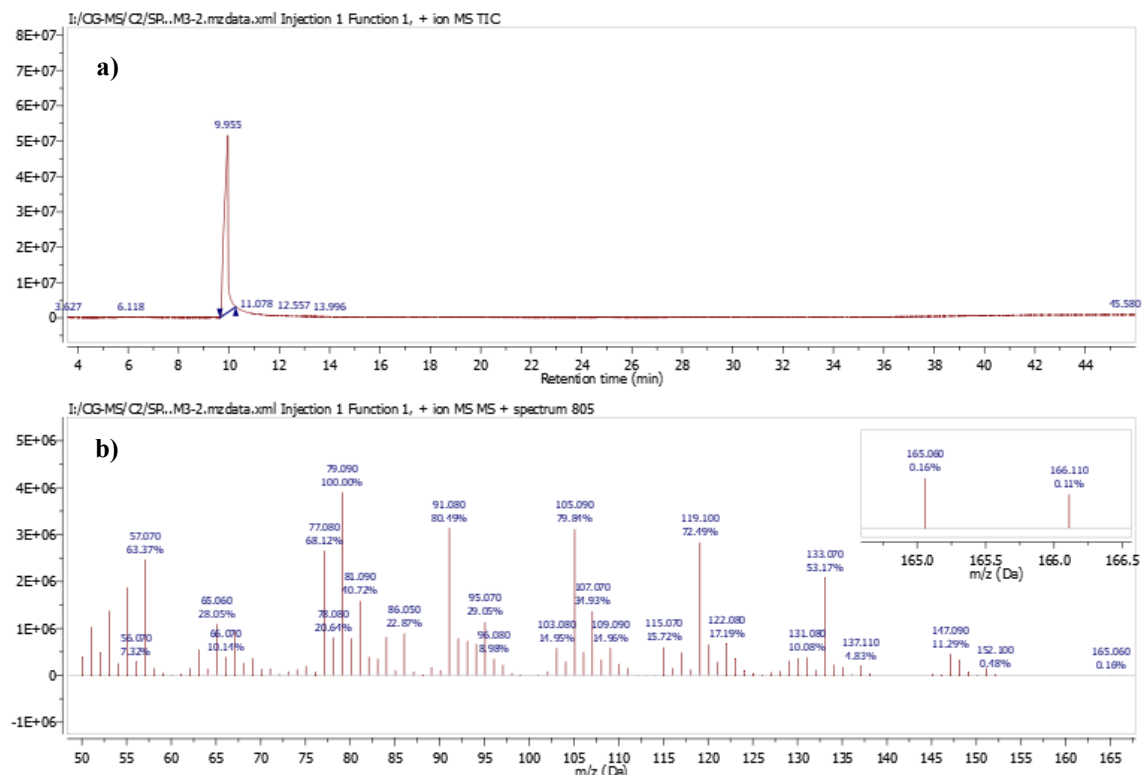



**Figure S2.** GC/MS chromatogram (a) and spectrum (b) of the Piquerol of *Piqueria trinervia*. The peak at 9.95 min corresponds to piquerol con 166.11 m/z

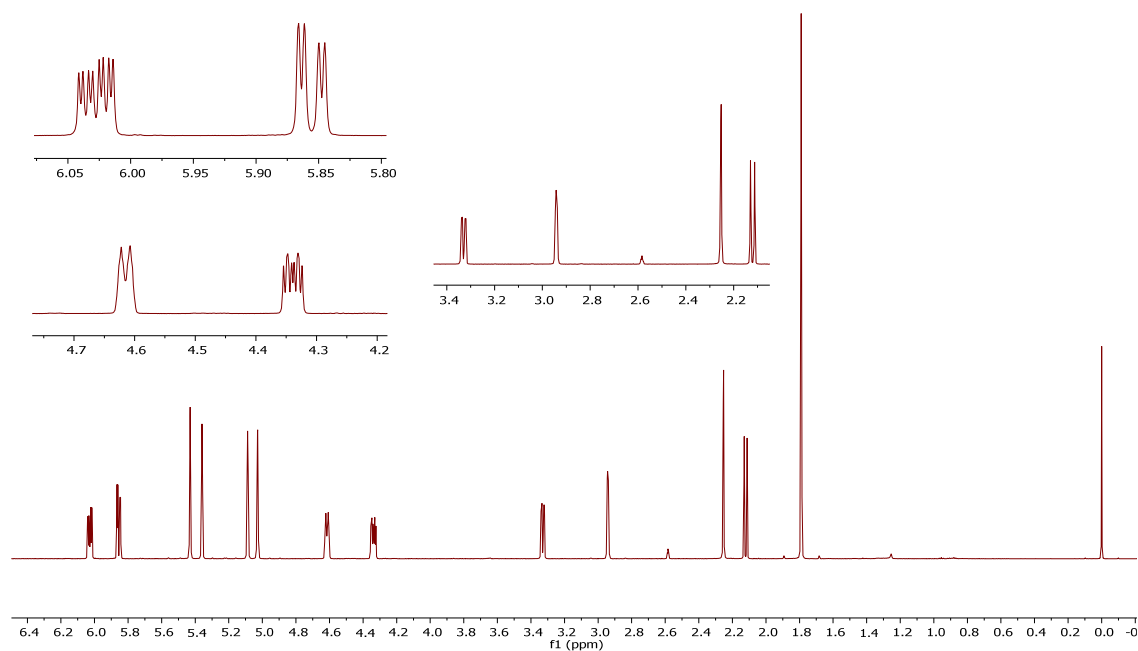

**Figure S3.** Piquerol  $^1\text{H}$ -NMR spectrum.

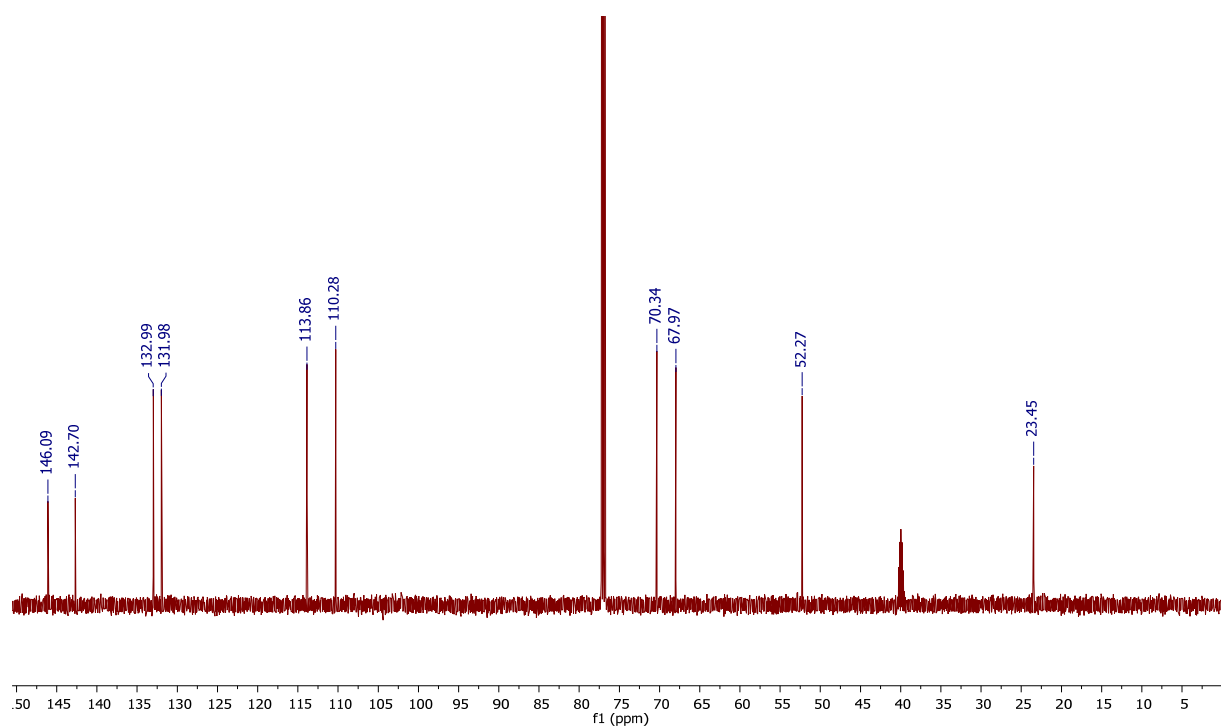

**Figure S4.** Piquerol  $^{13}\text{C}$ -NMR spectrum.
